# Supplementary material for: 2005–2017 ozone trends and potential benefits of local measures as deduced from air quality measurements in the north of the Barcelona Metropolitan Area
Source: Copernicus journal article supplement (doi:10.5194/acp-2019-33), 2019-02-25
Supplement: Supplementary file 1 [file acp-2019-33-supplement.pdf]

1 **2005-2017 ozone trends and potential benefits of local measures as deduced from air quality**  
2 **measurements in the north of the Barcelona Metropolitan Area**

3 Jordi Massagué<sup>1, 2</sup>, Cristina Carnerero<sup>1, 2</sup>, Miguel Escudero<sup>3</sup>, José María Baldasano<sup>4</sup>, Andrés Alastuey<sup>1</sup>, Xavier  
4 Querol<sup>1</sup>

5 <sup>1</sup> Institute of Environmental Assessment and Water Research (IDAEA-CSIC), Barcelona, 08034, Spain.

6 <sup>2</sup> Department of Civil and Environmental Engineering, Universitat Politècnica de Catalunya, Barcelona, 08034, Spain.

7 <sup>3</sup> Centro Universitario de la Defensa, Academia General Militar, 50090 Zaragoza, Spain.

8 <sup>4</sup> Department of Projects and Construction Engineering (DEPC), Universitat Politècnica de Catalunya, 08028 Barcelona,  
9 Spain.

10

11 **SUPPLEMENTARY MATERIAL**

12

13 **FIGURES**

14

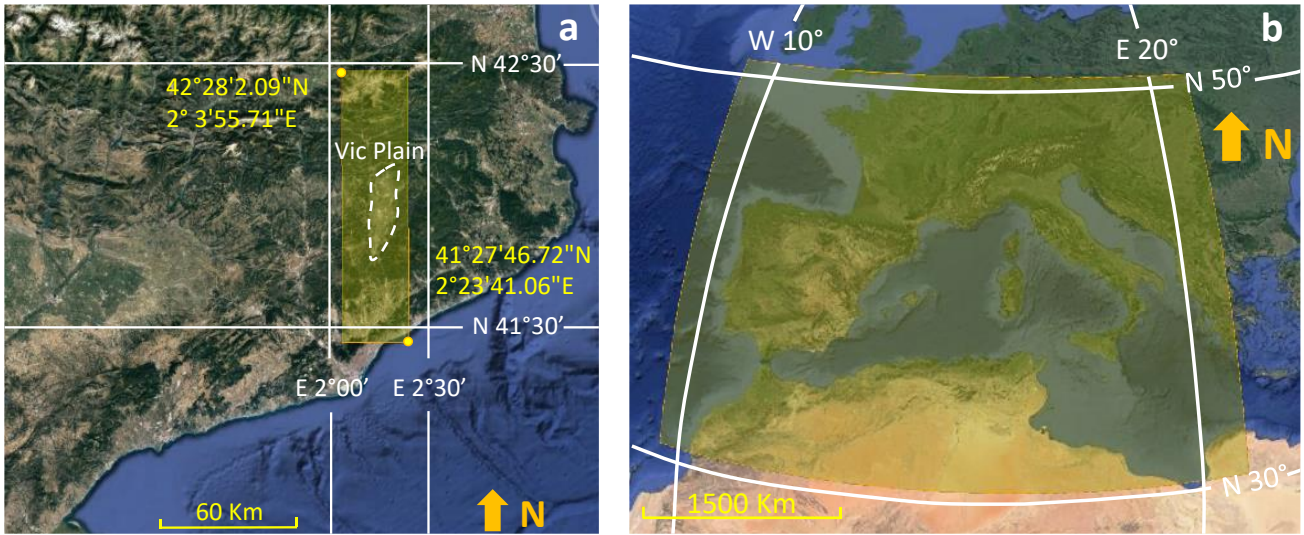

15

16 Figure S1. Selected regions for retrieval of OMI Tropospheric Column NO<sub>2</sub> in yellow: (a) area along the S–N  
17 axis (~3,040 km<sup>2</sup>) which includes northern Barcelona Metropolitan Area (BMA), the Vic Plain and an area of  
18 the Pre-Pyrenean range to analyze quantitatively the time trends and patterns and (b) across Western  
19 Europe (~6,514 × 10<sup>6</sup> km<sup>2</sup>) to analyze qualitatively the NO<sub>2</sub> spatial patterns in the two scenarios considered  
20 (when the amount of O<sub>3</sub> in the Vic Plain is high and when it is low).

21

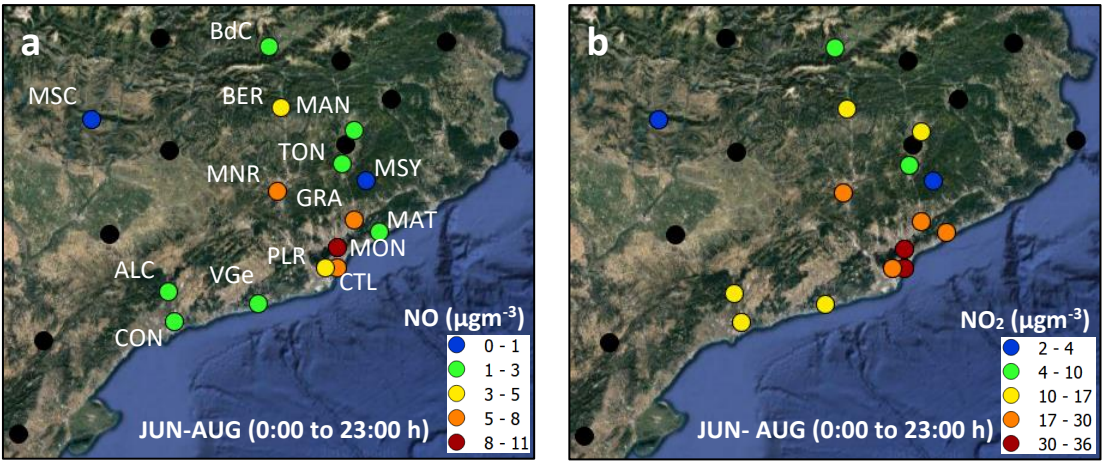

24 Figure S2. (a) Spatial variability of mean June–August NO (a) and NO<sub>2</sub> (b) concentrations observed in selected  
25 AQ sites. Data from Ciutadella (CTL), Palau Reial (PLR), Montcada (MON), Granollers (GRA), Montseny (MSY),  
26 Manlleu (MAN), Tona (TON), Montsec (MSC), Bellver de Cerdanya (BdC), Berga (BER), Mataró (MAT),  
27 Manresa (MNR), Vilanova i la Geltrú (VGe), Constantí (CON) and Alcover (ALC) air quality monitoring stations.

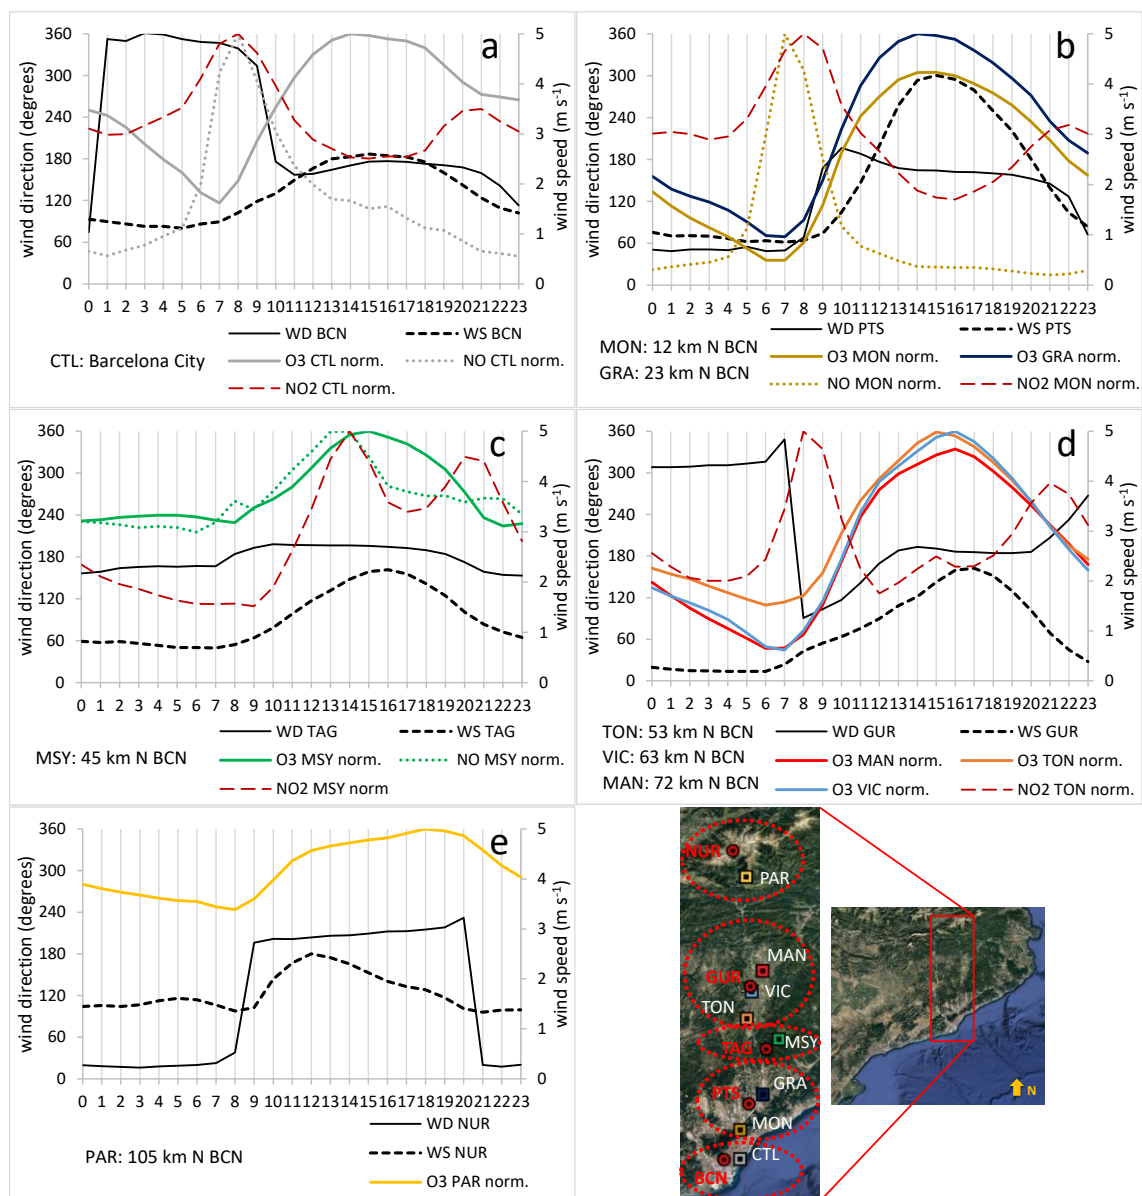

29

30 Figure S3. Normalized O<sub>3</sub>, NO and NO<sub>2</sub> cycles and wind patterns for July (wind coming direction in the left  
 31 vertical axis and wind speed in the right vertical axis). Pollutants' concentrations (O<sub>3</sub>, NO and NO<sub>2</sub>) are  
 32 normalized to the highest average value to emphasize the shape of the cycles, in the case of more than one  
 33 O<sub>3</sub> cycle in a graph (b and d plots), the O<sub>3</sub> concentrations are normalized to the highest O<sub>3</sub> values of the site  
 34 that measured them. July average wind speeds and directions data come from meteorological stations  
 35 located near the corresponding AQ sites (air quality CTL monitoring site with meteorological BCN; air quality  
 36 MON and GRA monitoring sites with meteorological PTS; air quality MSY monitoring site with meteorological  
 37 TAG; air quality TON, VIC and MAN monitoring sites with meteorological GUR; air quality PAR monitoring site  
 38 with meteorological NUR). The map shows the location of air quality monitoring sites (white codes; squares)  
 39 and close meteorological sites (red codes; circles) grouped by pointed circles. Air quality data are from  
 40 monitoring sites along the S-N axis. In general, the highest O<sub>3</sub> levels occur when the wind blows from the  
 41 south (location of the Barcelona Metropolitan Area, BMA) at its maximum velocity, confirming the clear  
 42 influence of the BMA plume transport.

43
